# Supplementary material
Source: MDPI journal article supplement (https://www.mdpi.com/2071-1050/8/1/17)
Supplement: s1 [file s1]

## Sheet: Sheet1
Evaluation Matrix of E-SPA Method
														Table S1. Evaluation matrix.
	IICS1	IICS2	IICS3	CICES1	CICES2	CICES3	IPCS1	IPCS2	IPCS3	CICS1	CICS2	CICS3	IEGS1	IESS1	IICA1	IICA2	IICA3	CICEA1	CICEA2	CICEA3	IPCA1	IPCA2	IPCA3	CICA1	CICA2	CICA3	IEGS2	IESS2
A	0.0915	0.308	0.4098	0.009	1.692	0.242	0.1237	0.0989	0.4	0.04	0.1295	267879	0.2157	0.0341	0.0915	0.0331	0.1135	0.4419	0.139	0.2184	0.231	993	0.139	0.5299	0.1	0.27	0.369	0.068
B	0.0878	0.305	0.3729	0.0117	1.12	0.244	0.1249	0.1059	0.387	0.058	0.1054	254396	0.2662	0.0405	0.1027	0.0149	0.1098	0.4297	0.152	0.2155	0.301	899	0.153	0.5373	0.0977	0.263	0.403	0.107
C	0.0917	0.289	0.4422	0.0097	1.43	0.257	0.1192	0.1366	0.429	0.039	0.1262	266902	0.1989	0.0392	0.0896	0.0299	0.1177	0.4358	0.144	0.2431	0.24	967	0.151	0.5292	0.0931	0.279	0.396	0.089
D	0.0798	0.309	0.3989	0.015	0.99	0.228	0.1251	0.1079	0.326	0.033	0.1455	267983	0.2309	0.0297	0.0939	0.0401	0.1109	0.4576	0.098	0.1767	0.229	952	0.147	0.5388	0.1034	0.254	0.433	0.097
E	0.0846	0.273	0.4225	0.0132	1.01	0.239	0.1305	0.1482	0.455	0.049	0.1321	259987	0.2099	0.0338	0.0729	0.0421	0.1203	0.4462	0.101	0.1823	0.206	1007	0.136	0.5164	0.0969	0.259	0.398	0.095
F	0.0922	0.284	0.4377	0.0073	1.73	0.231	0.1358	0.1337	0.361	0.031	0.1274	269808	0.1972	0.0302	0.0898	0.0313	0.1084	0.4088	0.127	0.1971	0.2	981	0.142	0.5301	0.1051	0.273	0.381	0.084
G	0.0901	0.291	0.3983	0.0068	1.66	0.255	0.1147	0.0952	0.399	0.029	0.1309	270002	0.2103	0.0396	0.0937	0.0347	0.0996	0.4147	0.13	0.1689	0.236	1017	0.137	0.5268	0.0998	0.285	0.399	0.106
H	0.0869	0.31	0.4017	0.0101	1.59	0.249	0.1206	0.1222	0.408	0.037	0.1311	268147	0.2076	0.0355	0.0959	0.03	0.1038	0.4351	0.136	0.1901	0.219	977	0.15	0.5303	0.1001	0.272	0.404	0.109
														Note: m = 8, n = 28.
The Max and Min in Judgment Matrix of E-SPA Method
														Table S2. The max and min of the evaluation matrix.
max	0.0922	0.31	0.4422	0.015	1.73	0.257	0.1358	0.1482	0.455	0.058	0.1455	270002	0.2662	0.0405	0.1027	0.0421	0.1203	0.4576	0.152	0.2431	0.301	1017	0.153	0.5388	0.1051	0.285	0.433	0.109
min	0.0798	0.273	0.3729	0.0068	0.99	0.228	0.1147	0.0952	0.326	0.029	0.1054	254396	0.1972	0.0297	0.0729	0.0149	0.0996	0.4088	0.098	0.1689	0.2	899	0.136	0.5164	0.0931	0.254	0.369	0.068
The Standardization of Evaluation Matrix of E-SPA Method
														Table S3. The standardization of evaluation matrix of E-SPA method.
code	IICS1	IICS2	IICS3	CICES1	CICES2	CICES3	IPCS1	IPCS2	IPCS3	CICS1	CICS2	CICS3	IEGS1	IESS1	IICA1	IICA2	IICA3	CICEA1	CICEA2	CICEA3	IPCA1	IPCA2	IPCA3	CICA1	CICA2	CICA3	IEGS2	IESS2
A	0.0564516	0.0540541	0.467532	0.268293	0.948649	0.517241	0.57346	0.930189	0.426357	0.62069	0.399002	0.136037	0.268116	0.407407	0.624161	0.669118	0.671498	0.678279	0.240741	0.667116	0.306931	0.79661	0.176471	0.602679	0.575	0.483871	1	1
B	0.354839	0.135135	1	0.597561	0.175676	0.448276	0.516588	0.798113	0.527132	0	1	1	1	1	1	0	0.492754	0.428279	0	0.628032	1	0	1	0.933036	0.383333	0.709677	0.46875	0.0487805
C	0.0403226	0.567568	0	0.353659	0.594595	0	0.78673	0.218868	0.20155	0.655172	0.481297	0.198642	0.0246377	0.87963	0.560403	0.551471	0.874396	0.553279	0.148148	1	0.39604	0.576271	0.882353	0.571429	0	0.193548	0.578125	0.487805
D	1	0.027027	0.62482	1	0	1	0.507109	0.760377	1	0.862069	0	0.129373	0.488406	0	0.704698	0.926471	0.545894	1	1	0.105121	0.287129	0.449153	0.647059	1	0.858333	1	0	0.292683
E	0.612903	1	0.284271	0.780488	0.027027	0.62069	0.251185	0	0	0.310345	0.334165	0.64174	0.184058	0.37963	0	1	1	0.766393	0.944444	0.180593	0.0594059	0.915254	0	0	0.316667	0.83871	0.546875	0.341463
F	0	0.702703	0.0649351	0.0609756	1	0.896552	0	0.273585	0.728682	0.931034	0.451372	0.0124311	0	0.0462963	0.567114	0.602941	0.425121	0	0.462963	0.380054	0	0.694915	0.352941	0.611607	1	0.387097	0.8125	0.609756
G	0.169355	0.513514	0.633478	0	0.905405	0.0689655	1	1	0.434109	1	0.36409	0	0.189855	0.916667	0.697987	0.727941	0	0.120902	0.407407	0	0.356436	1	0.0588235	0.464286	0.558333	0	0.53125	0.0731707
H	0.427419	0	0.584416	0.402439	0.810811	0.275862	0.720379	0.490566	0.364341	0.724138	0.359102	0.118865	0.150725	0.537037	0.771812	0.555147	0.202899	0.538934	0.296296	0.285714	0.188119	0.661017	0.823529	0.620536	0.583333	0.419355	0.453125	0
The Similarity Degree akp of E-SPA Method
														Table S4. The similarity degree akp of E-SPA method.
code	IICS1	IICS2	IICS3	CICES1	CICES2	CICES3	IPCS1	IPCS2	IPCS3	CICS1	CICS2	CICS3	IEGS1	IESS1	IICA1	IICA2	IICA3	CICEA1	CICEA2	CICEA3	IPCA1	IPCA2	IPCA3	CICA1	CICA2	CICA3	IEGS2	IESS2
A	0.467503	0.471308	0.49366	0.412844	0.622059	0.499242	0.502673	0.586095	0.474808	0.483333	0.47199	0.488965	0.465473	0.485755	0.521071	0.580702	0.516144	0.510042	0.428662	0.530097	0.461078	0.518267	0.480969	0.50218	0.504541	0.497423	0.5399	0.615819
B	0.487204	0.475944	0.54251	0.536697	0.411765	0.49515	0.497844	0.547354	0.490758	0.333333	0.579912	0.51488	0.57445	0.576923	0.584852	0.261404	0.499318	0.49596	0.392	0.523058	0.600798	0.469207	0.529412	0.509193	0.492936	0.510663	0.49435	0.391362
C	0.466483	0.502294	0.45749	0.444954	0.525735	0.470103	0.52165	0.42434	0.442711	0.495726	0.484332	0.490755	0.429219	0.558405	0.510251	0.524561	0.535243	0.503001	0.413778	0.590049	0.479042	0.504697	0.522491	0.501516	0.469728	0.481377	0.503089	0.470514
D	0.536047	0.469783	0.50715	0.688073	0.363971	0.529897	0.497048	0.537209	0.582586	0.585859	0.420088	0.488775	0.498274	0.423077	0.534738	0.703509	0.50432	0.528163	0.608	0.428883	0.457086	0.496868	0.508651	0.510614	0.521695	0.528757	0.4601	0.431708
E	0.505633	0.531732	0.478821	0.605505	0.371324	0.505508	0.47648	0.391126	0.417414	0.394558	0.462701	0.503807	0.452956	0.481481	0.415148	0.738596	0.547067	0.515005	0.589941	0.442476	0.411178	0.525574	0.470588	0.489386	0.4889	0.518549	0.500561	0.440797
F	0.463953	0.511137	0.462193	0.334862	0.636029	0.523015	0.457884	0.433544	0.526103	0.623656	0.47977	0.485469	0.42555	0.430199	0.51139	0.549123	0.492951	0.471837	0.469165	0.478398	0.399202	0.512004	0.491349	0.502369	0.530272	0.491957	0.522896	0.49852
G	0.474767	0.498842	0.507914	0.311927	0.610294	0.47379	0.542116	0.608874	0.475998	0.666667	0.466942	0.48512	0.45382	0.564103	0.533599	0.608772	0.452933	0.478647	0.458338	0.409951	0.471058	0.530793	0.474048	0.499242	0.503532	0.471243	0.499306	0.395054
H	0.49225	0.468268	0.503615	0.463303	0.584559	0.485207	0.515594	0.474344	0.465498	0.522523	0.46623	0.488476	0.447993	0.505698	0.546128	0.526316	0.472033	0.502193	0.438118	0.461408	0.437126	0.509916	0.519031	0.502559	0.505045	0.493766	0.493127	0.384181
The Opposition Degree ckp of E-SPA Method
												Table S5. The opposition degree ckp of E-SPA method
code	IICS1	IICS2	IICS3	CICES1	CICES2	CICES3	IPCS1	IPCS2	IPCS3	CICS1	CICS2	CICS3	IEGS1	IESS1	IICA1	IICA2	IICA3	CICEA1	CICEA2	CICEA3	IPCA1	IPCA2	IPCA3	CICA1	CICA2	CICA3	IEGS2	IESS2
A	0.531977	0.528302	0.50276	0.519878	0.372145	0.498969	0.493812	0.406327	0.512164	0.45977	0.516142	0.510831	0.525181	0.502481	0.465964	0.33248	0.480069	0.488601	0.556	0.456315	0.520172	0.480547	0.517986	0.497605	0.493684	0.500928	0.4601	0.384181
B	0.510465	0.523156	0.45749	0.399906	0.562205	0.503093	0.498603	0.435086	0.495519	0.666667	0.420088	0.48512	0.42555	0.423077	0.415148	0.738596	0.496246	0.502473	0.608	0.462456	0.399202	0.530793	0.470588	0.490752	0.505306	0.487941	0.502494	0.60452
C	0.53314	0.495712	0.54251	0.482361	0.440328	0.529897	0.475848	0.561216	0.549296	0.448276	0.502989	0.508968	0.56954	0.437108	0.475845	0.368063	0.462938	0.49544	0.576	0.409951	0.500665	0.493468	0.476821	0.498264	0.530272	0.517625	0.493766	0.502825
D	0.463953	0.530017	0.489388	0.311927	0.636029	0.470103	0.499401	0.443303	0.417414	0.37931	0.579912	0.51103	0.490608	0.576923	0.454054	0.274441	0.491324	0.471837	0.392	0.564002	0.524715	0.501243	0.489796	0.489386	0.47745	0.471243	0.5399	0.548023
E	0.49186	0.468268	0.518341	0.354462	0.623435	0.492784	0.520958	0.608874	0.582586	0.563218	0.526505	0.495782	0.539693	0.506941	0.584852	0.261404	0.452933	0.483893	0.404	0.546677	0.583299	0.473866	0.529412	0.510614	0.509477	0.480519	0.496259	0.536723
F	0.536047	0.487136	0.536989	0.640945	0.363971	0.476289	0.542116	0.549302	0.462228	0.356322	0.507772	0.51451	0.57445	0.567371	0.474785	0.3516	0.502656	0.528163	0.508	0.505628	0.600798	0.486425	0.507042	0.497418	0.469728	0.506494	0.475062	0.474576
G	0.523837	0.499142	0.488652	0.688073	0.379319	0.525773	0.457884	0.391126	0.510883	0.333333	0.521722	0.51488	0.538666	0.432692	0.455024	0.31715	0.547067	0.520648	0.52	0.590049	0.509151	0.469207	0.525547	0.500534	0.494673	0.528757	0.497506	0.59887
H	0.505233	0.531732	0.492823	0.463257	0.396018	0.513402	0.481437	0.502054	0.522407	0.425287	0.522519	0.511343	0.545672	0.482665	0.444585	0.366836	0.524931	0.496237	0.544	0.524246	0.548674	0.488417	0.48	0.49723	0.49319	0.504638	0.503741	0.615819
The Evaluation Matrix of P-SPA Method
													Table S6. The evaluation matrix of P-SPA method
code	IICS1	IICS2	IICS3	CICES1	CICES2	CICES3	IPCS1	IPCS2	IPCS3	CICS1	CICS2	CICS3	IEGS1	IESS1	IICA1	IICA2	IICA3	CICEA1	CICEA2	CICEA3	IPCA1	IPCA2	IPCA3	CICA1	CICA2	CICA3	IEGS2	IESS2
Index code	V1	V2	V3	V4	V5	V6	V7	V8	V9	V10	V11	V12	V13	V14	V15	V16	V17	V18	V19	V20	V21	V22	V23	V24	V25	V26	V27	V28
A	0.0915	0.308	0.4098	0.009	1.692	0.242	0.1237	0.0989	0.4	0.04	0.1295	267879	0.2157	0.0341	0.0915	0.0331	0.1135	0.4419	0.139	0.2184	0.231	993	0.139	0.5299	0.1	0.27	0.369	0.068
B	0.0878	0.305	0.3729	0.0117	1.12	0.244	0.1249	0.1059	0.387	0.058	0.1054	254396	0.2662	0.0405	0.1027	0.0149	0.1098	0.4297	0.152	0.2155	0.301	899	0.153	0.5373	0.0977	0.263	0.403	0.107
C	0.0917	0.289	0.4422	0.0097	1.43	0.257	0.1192	0.1366	0.429	0.039	0.1262	266902	0.1989	0.0392	0.0896	0.0299	0.1177	0.4358	0.144	0.2431	0.24	967	0.151	0.5292	0.0931	0.279	0.396	0.089
D	0.0798	0.309	0.3989	0.015	0.99	0.228	0.1251	0.1079	0.326	0.033	0.1455	267983	0.2309	0.0297	0.0939	0.0401	0.1109	0.4576	0.098	0.1767	0.229	952	0.147	0.5388	0.1034	0.254	0.433	0.097
E	0.0846	0.273	0.4225	0.0132	1.01	0.239	0.1305	0.1482	0.455	0.049	0.1321	259987	0.2099	0.0338	0.0729	0.0421	0.1203	0.4462	0.101	0.1823	0.206	1007	0.136	0.5164	0.0969	0.259	0.398	0.095
F	0.0922	0.284	0.4377	0.0073	1.73	0.231	0.1358	0.1337	0.361	0.031	0.1274	269808	0.1972	0.0302	0.0898	0.0313	0.1084	0.4088	0.127	0.1971	0.2	981	0.142	0.5301	0.1051	0.273	0.381	0.084
G	0.0901	0.291	0.3983	0.0068	1.66	0.255	0.1147	0.0952	0.399	0.029	0.1309	270002	0.2103	0.0396	0.0937	0.0347	0.0996	0.4147	0.13	0.1689	0.236	1017	0.137	0.5268	0.0998	0.285	0.399	0.106
H	0.0869	0.31	0.4017	0.0101	1.59	0.249	0.1206	0.1222	0.408	0.037	0.1311	268147	0.2076	0.0355	0.0959	0.03	0.1038	0.4351	0.136	0.1901	0.219	977	0.15	0.5303	0.1001	0.272	0.404	0.109
The Component Matrix of P-SPA Method
		Table S7. Component Matrix a.
Index code	Principle component a
	1	2	3	4	5	6
V1	−0.078	0.935	0.074	−0.328	−0.023	−0.045
V2	0.591	−0.136	−0.550	−0.048	0.387	−0.261
V3	−0.740	0.256	0.29	−0.290	0.311	0.324
V4	0.203	−0.914	0.279	0.103	0.183	−0.003
V5	−0.276	0.816	−0.423	−0.189	0.026	−0.067
V6	0.221	0.73	0.227	0.562	0.222	0.035
V7	−0.315	−0.386	0.202	−0.731	−0.385	0.155
V8	−0.462	−0.111	0.65	−0.155	0.008	0.55
V9	−0.188	0.387	0.781	0.365	−0.026	−0.103
V10	0.585	−0.187	0.715	−0.106	−0.219	−0.177
V11	−0.688	−0.431	−0.381	0.254	0.36	−0.034
V12	−0.605	0.275	−0.649	0.036	0.36	0.077
V13	0.855	−0.381	0.021	−0.042	−0.242	−0.230
V14	0.582	0.581	0.311	0.457	−0.034	−0.022
V15	0.781	0.197	−0.573	−0.098	0.094	0.061
V16	−0.844	−0.391	−0.062	0.288	0.142	−0.146
V17	−0.190	−0.314	0.803	−0.292	0.322	−0.117
V18	0.045	−0.726	0.242	0.157	0.529	−0.300
V19	0.593	0.764	0.054	−0.192	0.1	−0.013
V20	0.334	0.42	0.465	−0.462	0.528	0.01
V21	0.953	0.079	0.115	0.048	−0.037	−0.133
V22	−0.861	0.277	−0.061	0.343	−0.068	−0.233
V23	0.736	−0.055	0.007	−0.145	0.4	0.501
V24	0.666	−0.200	−0.563	−0.308	0.277	0.106
V25	−0.250	−0.298	−0.769	−0.380	−0.326	0.008
V26	−0.136	0.932	−0.187	0.219	0.052	0.125
V27	0.273	−0.696	−0.206	0.463	0.128	0.386
V28	0.435	−0.152	−0.101	0.643	−0.333	0.484
Extraction Method: Principal Component Analysis. a 6 components extracted.
The Liner Relationship between F and Index
Table S8. The relationship between principle component F and index
Index code	F1	F2	F3	F4	F5	F6
V1	−0.026804124	0.347584	0.0324561	−0.188505747	−0.016197183	−0.037190083
V2	0.203093	−0.050557621	−0.24122807	−0.027586207	0.272535	−0.215702479
V3	−0.254295533	0.0951673	0.127193	−0.166666667	0.219014	0.267769
V4	0.0697595	−0.339776952	0.122368	0.0591954	0.128873	−0.002479339
V5	−0.094845361	0.303346	−0.185526316	−0.10862069	0.0183099	−0.055371901
V6	0.075945	0.271375	0.0995614	0.322989	0.156338	0.0289256
V7	−0.108247423	−0.143494424	0.0885965	−0.420114943	−0.271126761	0.128099
V8	−0.158762887	−0.041263941	0.285088	−0.08908046	0.0056338	0.454545
V9	−0.064604811	0.143866	0.342544	0.20977	−0.018309859	−0.085123967
V10	0.201031	−0.069516729	0.313596	−0.06091954	−0.154225352	−0.146280992
V11	−0.236426117	−0.160223048	−0.167105263	0.145977	0.253521	−0.028099174
V12	−0.20790378	0.10223	−0.284649123	0.0206897	0.253521	0.0636364
V13	0.293814	−0.141635688	0.00921053	−0.024137931	−0.170422535	−0.190082645
V14	0.2	0.215985	0.136404	0.262644	−0.023943662	−0.018181818
V15	0.268385	0.0732342	−0.251315789	−0.056321839	0.0661972	0.0504132
V16	−0.290034364	−0.14535316	−0.027192982	0.165517	0.1	−0.120661157
V17	−0.065292096	−0.116728625	0.352193	−0.167816092	0.226761	−0.096694215
V18	0.0154639	−0.269888476	0.10614	0.0902299	0.372535	−0.247933884
V19	0.20378	0.284015	0.0236842	−0.110344828	0.0704225	−0.010743802
V20	0.114777	0.156134	0.203947	−0.265517241	0.371831	0.00826446
V21	0.327491	0.029368	0.0504386	0.0275862	−0.026056338	−0.109917355
V22	−0.295876289	0.102974	−0.026754386	0.197126	−0.047887324	−0.192561983
V23	0.252921	−0.020446097	0.00307018	−0.083333333	0.28169	0.41405
V24	0.228866	−0.074349442	−0.246929825	−0.177011494	0.19507	0.0876033
V25	−0.085910653	−0.110780669	−0.337280702	−0.218390805	−0.229577465	0.00661157
V26	−0.046735395	0.346468	−0.082017544	0.125862	0.0366197	0.103306
V27	0.0938144	−0.258736059	−0.090350877	0.266092	0.0901408	0.319008
V28	0.149485	−0.056505576	−0.044298246	0.36954	−0.234507042	0.4
The Scree Plot of P-SPA Method
				Figure S1. The scree plot （Eigenvalues>1）.
